# Supplementary material for: β-Cyclodextrin decorated nanocellulose: a smart approach towards the selective fluorimetric determination of danofloxacin in milk samples
Source: Royal Society of Chemistry journal article supplement (doi:10.1039/c4an01967a), 2015-01-01
Supplement: c4an01967a1.pdf [file c4an01967a1.pdf]

# **$\beta$ -Cyclodextrin decorated Nanocellulose: A smart approach towards the selective fluorimetric determination of danofloxacin in milk samples**

## **SUPPORTING INFORMATION**

*Celia Ruiz-Palomero, M. Laura Soriano, Miguel Valcárcel\**

Department of Analytical Chemistry, Marie Curie Building. Campus de Rabanales,  
University of Córdoba, E-14071 Córdoba, Spain

\*E-mail: [qa1meobj@uco.es](mailto:qa1meobj@uco.es). Phone: +34 957 218616

A

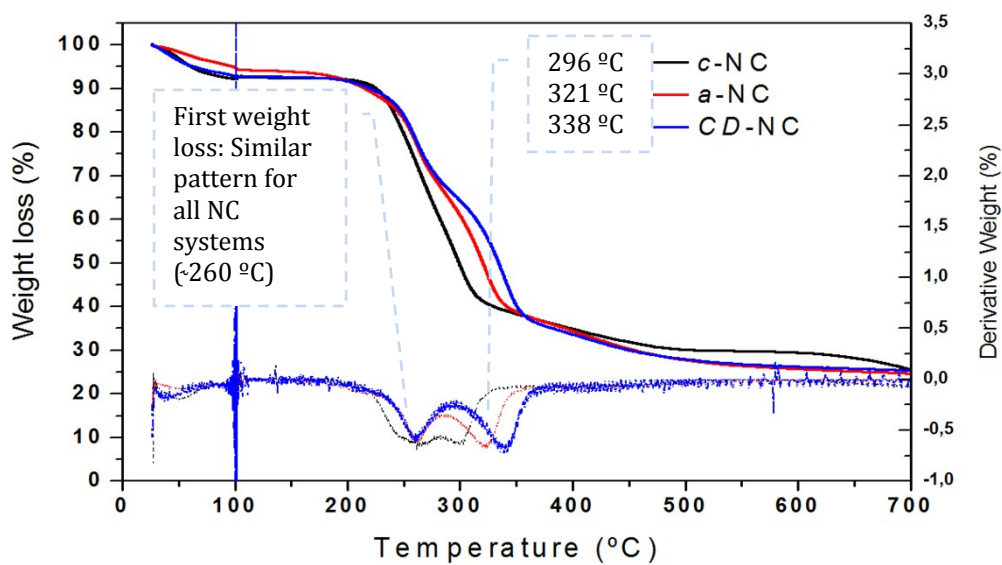

B

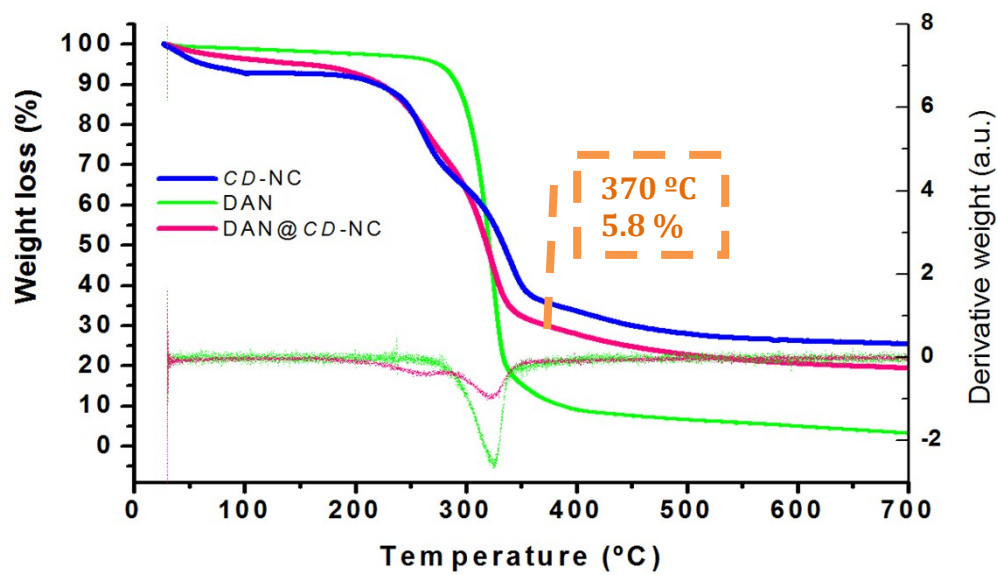

**Figure S1.** TGA analysis of *c*-NC, *a*-NC and *CD*-NC (A) and both bound and unbound *CD*-NC and danofloxacin (B).

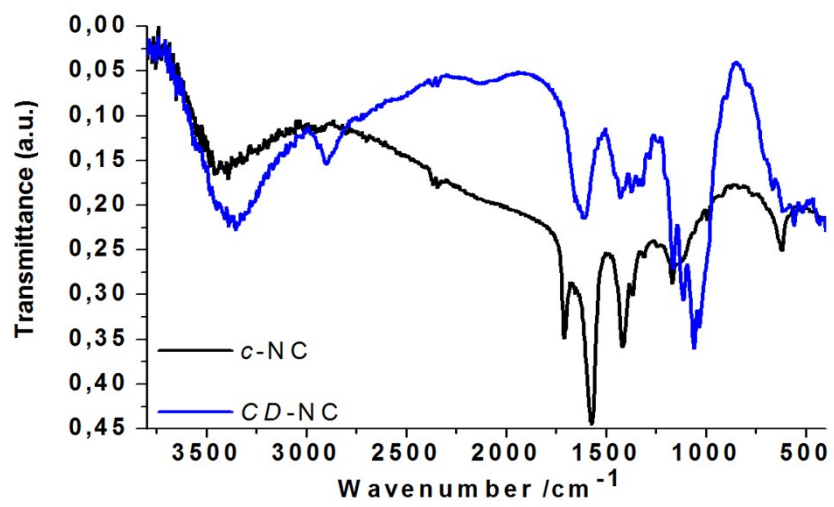

**Figure S2.** IR spectra of *c*-NC and *CD*-NC.

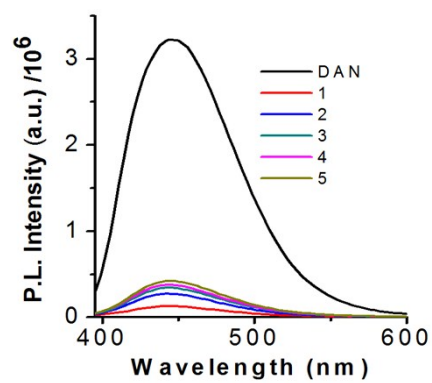

(A)

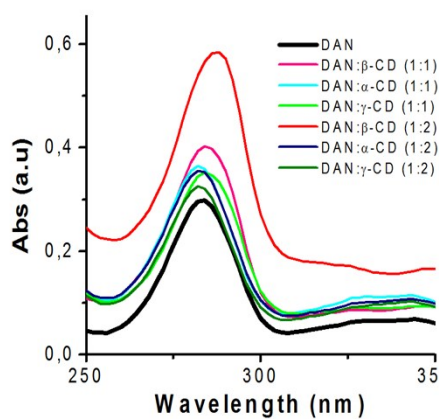

(B)

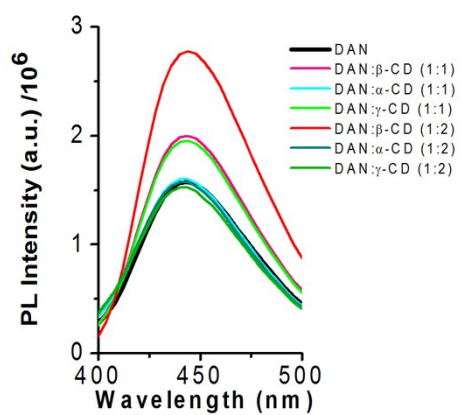

(C)

**Figure S3.** PL behaviour of DAN in aqueous solution in presence of different concentrations of NC modified with  $\beta$ -CD (A). Absorption (B) and fluorescent spectra of DAN in absence and in presence of  $\alpha$ -CD,  $\beta$ -CD and  $\gamma$ -CD (C).

**Table S1.** Selected parameters and optimized values for elution of danofloxacin.

| <b>Parameters considered</b> | <b>Interval studied</b> | <b>Optimal value</b> |
|------------------------------|-------------------------|----------------------|
| Phosphate concentration      | 25-100mM                | 50mM                 |
| pH buffer                    | 2.5-4.5                 | 3.5                  |
| Organic solvent proportion   | 0-30%                   | 12% of MeCN          |
| MeOH volume before elution   | 0-300 $\mu$ L           | 150 $\mu$ L          |

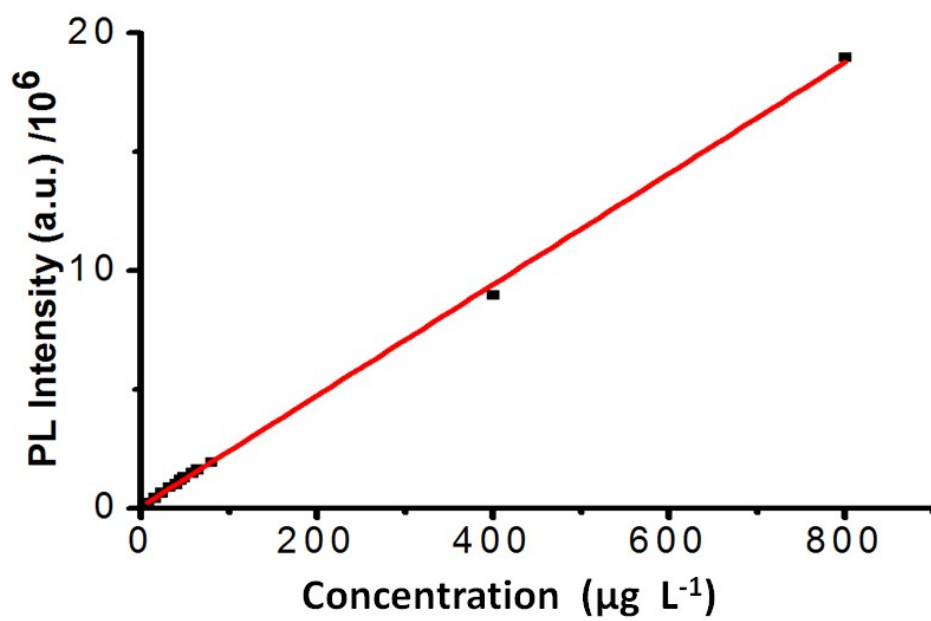

**Figure S4.** Linearity of the proposed method.

**Table S2.** Comparison of different commercial sorbents in the determination of quinolones.

| Analyte          | Type of sorbent   | Absolute extraction recovery (%) | Detection system | Limit of Detection (LoD) ( $\mu\text{g/L}$ ) | Reference                                                |
|------------------|-------------------|----------------------------------|------------------|----------------------------------------------|----------------------------------------------------------|
| Quinolones       | SDB-RPS           | 66-91                            | CE-DAD           | 14-25                                        | Electrophoresis. 25 (2004) 65-73                         |
|                  | Oasis Max         | 23-96                            |                  | 7-30                                         |                                                          |
| Quinolones       | SDB-RPS           | 81-93                            | LC-UV            | 5-12                                         | Ovidius University Annals of Chemistry 20 (2009) 165-179 |
| Quinolones       | Strata X          | -                                | LC-UV            | 9-13                                         | Analytica Chimica Acta. 613 (2008) 98-107                |
|                  |                   |                                  | LC-FD            | 3-8                                          |                                                          |
|                  |                   |                                  | LC-MS            | 1-5                                          |                                                          |
|                  |                   |                                  | LC-MS-MS         | 0.5-1                                        |                                                          |
| Quinolones       | Oasis HLB         | 61-87                            | LC-UV            | 5-10                                         | Journal of Chromatography A. 1029 (2004) 145-151         |
|                  | Oasis Max         | 23-96                            |                  | 5-10                                         |                                                          |
|                  | SDB-RPS           | 66-91                            |                  | 5-10                                         |                                                          |
|                  | Direct Extraction | 42-80                            |                  | 10-30                                        |                                                          |
| Fluoroquinolones | Oasis HLB         | -                                | CE               | 13-20                                        | Chromatographia. 68 (2008) 425-429                       |
| Fluoroquinolones | Oasis HLB         | -                                | CE               | 20-30                                        | Electrophoresis 2012, 33, 2978-2986                      |
| Fluoroquinolones | C18               | 85-97                            | HPLC-FD          | 10-50                                        | Microchemical Journal 110 (2013) 533-537                 |

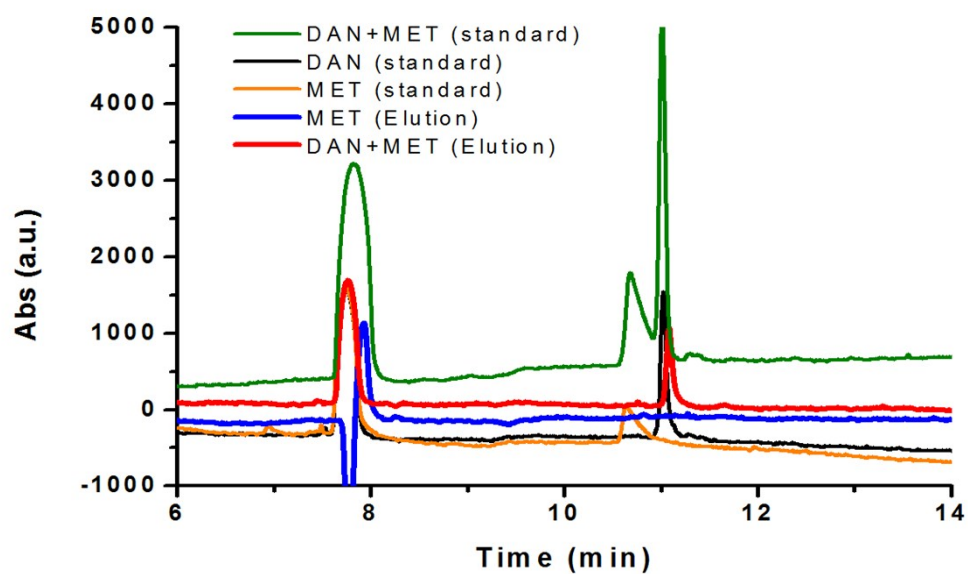

**Figure S5.** Electrophoretic profiles of standards of both DAN and MET together (at  $2.5 \text{ mg L}^{-1}$ ) or independently (at  $1.0 \text{ mg L}^{-1}$ ) and the eluted solution after using samples containing DAN and MET together and independently.
